# Supplementary material for: Dihydrotanshinone Triggers Porimin-Dependent Oncosis by ROS-Mediated Mitochondrial Dysfunction in Non-Small-Cell Lung Cancer
Source: MDPI journal article supplement (doi:10.3390/ijms241511953), 2023-07-26
Supplement: s1 [file s1]

Supplementary material:

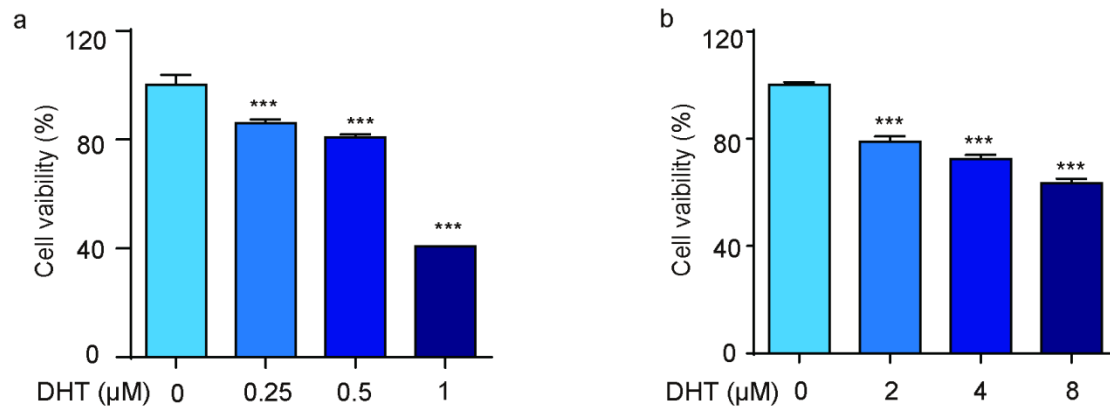

**Supplementary Figure S1. DHT inhibited the activity of H1299 cells and HLF cells.** **a** H1299 cells were treated with different concentrations of DHT (0.25, 0.5, 1 μM) for 24 hours, and then the cell activity was detected by microplate reader. **b** HLF cells were treated with different concentrations of DHT (2, 4, 8 μM) for 24 hours, and then the cell activity was detected by microplate reader. ( $n \geq 3$ , \*\*\* $p < 0.001$  vs DHT (0 μM) group. )
